# Supplementary material for: High-Throughput Synthesis of Nanogap-Rich Gold Nanoshells Using Dual-Channel Infusion System
Source: MDPI journal article supplement (doi:10.3390/ijms25031649), 2024-01-29
Supplement: s1 [file s1]

# High-Throughput Synthesis of Nanogap-Rich Gold Nanoshells Using Dual-Channel Infusion System

Yoon-Hee Kim <sup>1</sup>, Hye-Seong Cho <sup>1</sup>, Kwanghee Yoo <sup>1</sup>, Kyeong-Min Ham <sup>1</sup>, Homan Kang <sup>2</sup>, Xuan-Hung Pham <sup>1,\*</sup> and Bong-Hyun Jun <sup>1,\*</sup>

<sup>1</sup> Department of Bioscience and Biotechnology, Konkuk University, Seoul 05029, Republic of Korea; yoonhees@konkuk.ac.kr (Y.-H. Kim); joh0302@naver.com (H.-S. Cho); heu1997@konkuk.ac.kr (K. Yoo); hkm7321@konkuk.ac.kr (K.-M. Ham)

<sup>2</sup> Gordon Center for Medical Imaging, Department of Radiology, Massachusetts General Hospital and Harvard Medical School, Boston, MA 02114, USA; hkang7@mgh.harvard.edu (H. Kang)

\* Correspondence: phamricky@gmail.com (X.-H. Pham); bjun@konkuk.ac.kr (B.-H. Jun)

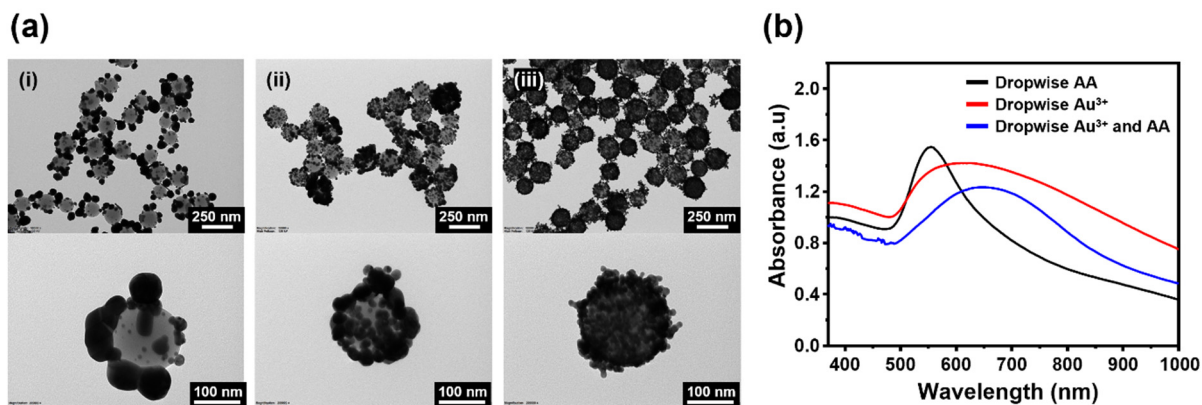

**Figure S1.** (a) TEM images and (b) UV-visible absorption spectra of SiO<sub>2</sub>@Au NS prepared by controlling the addition of Au<sup>3+</sup> precursor and AA solution: (i) dropwise addition of AA solution after batch addition of Au<sup>3+</sup> solution, (ii) dropwise addition of Au<sup>3+</sup> solution after batch addition of AA solution, and (iii) dropwise addition of both Au<sup>3+</sup> and AA solution.

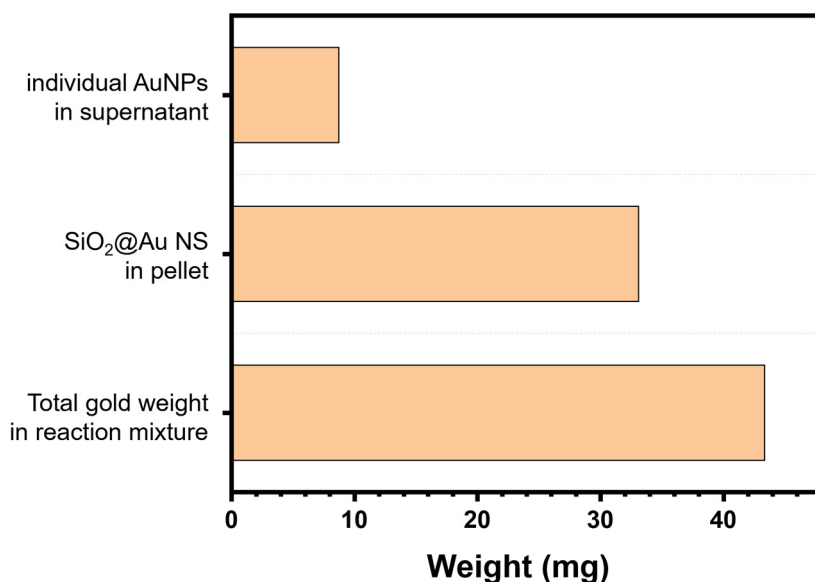

**Figure S2.** Gravimetric analysis of individual Au NPs and grown SiO<sub>2</sub>@Au NS in the reaction mixture of high-throughput seed-mediated growth process with 4.4 mL Au<sup>3+</sup> precursor solution. The supernatant (containing individual AuNPs) and pellet (containing SiO<sub>2</sub>@Au NS) were separated by centrifugation with 800 g. The increased

weight of each component was measured after drying solvent in vacuum chamber.

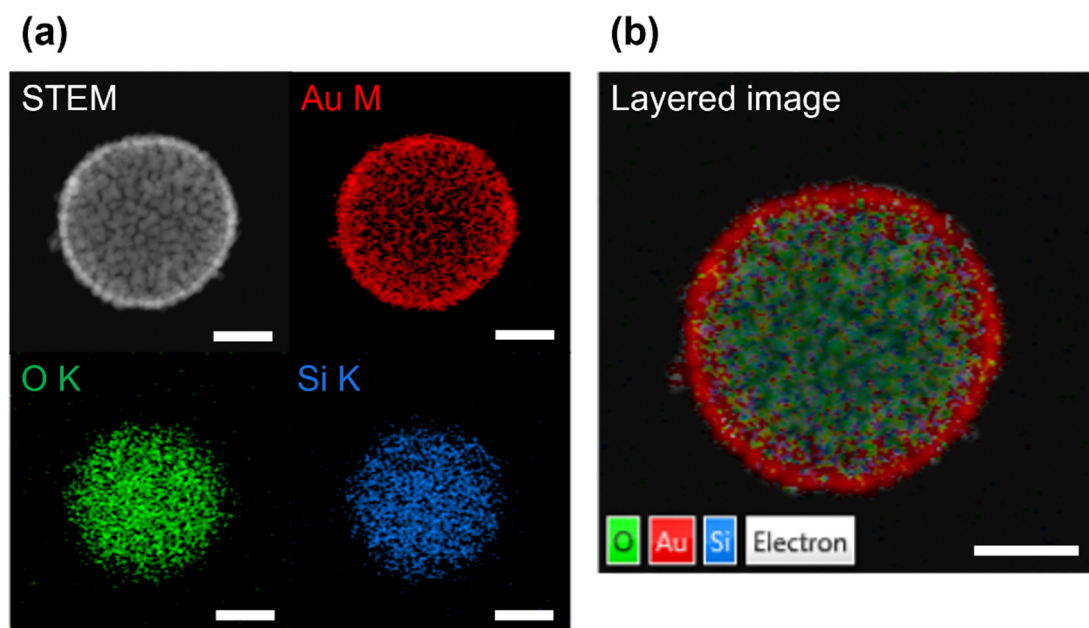

**Figure S3.** EDS maps of high-throughput synthesized SiO<sub>2</sub>@Au NS captured by Cs-corrected TEM (JEM-ARM200F, Jeol, Tokyo). (a) Scanning transmission microscope image and EDS mapping images of gold (red dots), oxygen (green dots) and silicon (blue dots). (b) STEM-EDS layered mapping image of SiO<sub>2</sub>@Au NS. Inset scale bars indicate 50 nm.

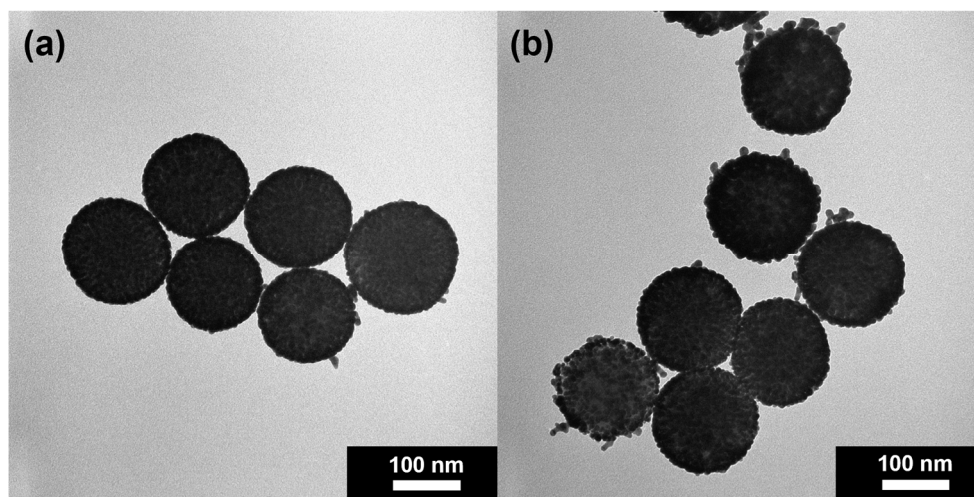

**Figure S4.** TEM images of SiO<sub>2</sub>@Au NS prepared through (a) the reported 0.2 mg NPs scaled method and (b) high-throughput 10 mg NPs scaled method (this work).
